# Supplementary material
Source: publisher figshare collection journal article supplement (https://karger.figshare.com/ndownloader/files/12793256)
Supplement: Supplementary file 1 [file 12793256]

**Associated pulmonary hypertension is an independent contributor to exercise intolerance in chronic fibrosing interstitial pneumonias**

David K. Yoo, MD1, Maurizio Zompatori, MD2, Annapina Barrile, MD3, Giorgia Rossi, MD4, Dejanira D’Amato, MD4, Gianluigi Sergiacomi, MD4, Paola Rogliani, MD3, Marco Mura, MD, PhD1

1Division of Respirology, Schulich School of Medicine and Dentistry, Western University, London, Ontario, Canada

2Radiologia, MultiMedica Group, I.R.C.C.S. San Giuseppe Hospital, Milan, Italy

3Malattie Respiratorie, Policlinico Tor Vergata, University of Rome “Tor Vergata”, Rome, Italy

4Diagnostica per Immagini e Radiologia Interventistica, Policlinico Tor Vergata, University of Rome “Tor Vergata”, Rome, Italy

Corresponding Author: Marco Mura, MD, PhD

London Health Science Centre, Victoria Hospital, 800 Commissioners Road East, Room E6-203 N6A 5W9 London, Ontario, Canada

Tel. +1-519-667-6744 Fax +1-519-685-8406

e-mail [marco.mura@lhsc.on.ca](mailto:marco.mura@lhsc.on.ca)

**SUPPLEMENTAL MATERIAL**

**e-Table 1**.Relationship between 6MWD (m), demographic, functional, hemodynamic and radiographic variables in all patients (n=72).

|  | **Correlation Coefficient (r/rho)** | **pvalue** |
| --- | --- | --- |
| **Demographics** | | |
| **Age** | -0.53 | <0.0001 |
| **BMI** | -0.30 | 0.0135 |
| **Hemodynamics** | | |
| **mPAP** | -0.32 | 0.0066 |
| **CO** | 0.17 | n.s. |
| **PVR** | -0.28 | 0.0253 |
| **Pulmonary Function** | | |
| **FVC** (% pred) | -0.27 | 0.0253 |
| **DLCO** (% pred) | -0.02 | n.s. |
| **Radiographic Data** | | |
| **PA Size** | -0.15 | n.s. |
| **PA:A Ratio** | -0.22 | n.s. |
| **HRCT Fibrosis** | 0.11 | n.s. |

Abbreviations: A: ascending aorta, BMI: body mass index, CO: cardiac output, DLCO: carbon monoxide diffusion capacity, FVC: forced vital capacity, HRCT: high-resolution computed tomography, mPAP: mean pulmonary arterial pressure, PA: pulmonary artery, PVR: pulmonary vascular resistance, 6MWD: six-minute walk distance.

**e-Table 2**. Relationship between 6MWD (% pred), demographic, functional, hemodynamic and radiographic variables in patients with APH only (n=55).

|  | **Correlation Coefficient (r/rho)** | **pvalue** |
| --- | --- | --- |
| **Pulmonary function** | | |
| **FVC** (% pred) | -0.14 | n.s. |
| **DLCO** (% pred) | -0.03 | n.s. |
| **Hemodynamics** | | |
| **mPAP** | -0.31 | 0.0221 |
| **CO** | 0.21 | n.s. |
| **PVR** | -0.33 | 0.0199 |
| **CT measurements** | | |
| **PA Size** | -0.13 | n.s. |
| **PA:A Ratio** | -0.03 | n.s. |
| **HRCT Fibrosis** | -0.01 | n.s. |

Abbreviations: A: ascending aorta, APH: associated pulmonary hypertension, BMI: body mass index, CO: cardiac output, DLCO: carbon monoxide diffusion capacity, FVC: forced vital capacity, HRCT: high-resolution computed tomography, mPAP: mean pulmonary arterial pressure, PA: pulmonary artery, PVR: pulmonary vascular resistance, 6MWD: six-minute walk distance.

**e-Table 3**. Independent, significant predictors of 6MWD (% pred) selected by stepwise multiple regression analysis. Patients with APH only (n=55). HRCT fibrosis score, FVC, DLCO, left heart dysfunction, coronary artery disease, sleep apnea, pulmonary rehabilitation, presence of obstructive defect and concomitant emphysema were not significant.

| **Covariables** | **F ratio** | **p value** |
| --- | --- | --- |
| **PVR** | 4.52 | 0.0387 |

Abbreviations: APH: associated pulmonary hypertension, DLCO: carbon monoxide diffusion capacity, FVC: forced vital capacity, HRCT: high-resolution computed tomography, PVR: pulmonary vascular resistance, 6MWD: six-minute walk distance.

**e-Table 4.** Independent, significant predictors of 6MWD (m) selected by stepwise multiple regression analysis. All patients (n=72). HRCT fibrosis score, FVC, DLCO, left heart dysfunction, coronary artery disease, sleep apnea, pulmonary rehabilitation, presence of obstructive defect and concomitant emphysema were not significant.

| **Covariables** | **F ratio** | **p-value** | **VIF vs PVR** |
| --- | --- | --- | --- |
| **Age** | 18.70 | 0.0001 | 1.03 |
| **PVR** | 4.69 | 0.0343 |  |
| **BMI** | 3.91 | 0.0524 | 1.03 |

Abbreviations: BMI: body mass index, DLCO: carbon monoxide diffusion capacity, FVC: forced vital capacity, HRCT: high-resolution computed tomography, PVR: pulmonary vascular resistance, VIF: variance inflation factor, 6MWD: six-minute walk distance.

**e-Table 5A**. Independent, significant predictors of 6MWD (% pred) selected by stepwise multiple regression analysis. Patients with normal wedge pressure (≤15 mmHg) only (n=62). HRCT fibrosis score, FVC, DLCO, left heart dysfunction, coronary artery disease, sleep apnea, pulmonary rehabilitation, presence of obstructive defect and concomitant emphysema were not significant.

| **Covariables** | **F ratio** | **p value** |
| --- | --- | --- |
| **PVR** | 4.26 | 0.0440 |

Abbreviations: DLCO: carbon monoxide diffusion capacity, FVC: forced vital capacity, HRCT: high-resolution computed tomography, PVR: pulmonary vascular resistance, 6MWD: six-minute walk distance.

**e-Table 5B**. Independent, significant predictors of 6MWD (m) selected by stepwise multiple regression analysis. Patients with normal wedge pressure (≤15 mmHg) only (n=62). HRCT fibrosis score, FVC, DLCO, left heart dysfunction, coronary artery disease, sleep apnea, pulmonary rehabilitation, presence of obstructive defect and concomitant emphysema were not significant.

| **Covariables** | **F ratio** | **p value** |
| --- | --- | --- |
| **Age** | 16.90 | 0.0001 |
| **BMI** | 4.69 | 0.0349 |
| **PVR** | 4.38 | 0.0412 |

Abbreviations: BMI: body mass index, DLCO: carbon monoxide diffusion capacity, FVC: forced vital capacity, HRCT: high-resolution computed tomography, PVR: pulmonary vascular resistance, 6MWD: six-minute walk distance.

**e-Table 6**. Independent, significant predictors of MRC dyspnea score (MRCDS) selected by stepwise multiple regression analysis. Patients with APH only (n=55). HRCT fibrosis score, FVC, DLCO, left heart dysfunction, coronary artery disease, sleep apnea, pulmonary rehabilitation, presence of obstructive defect and concomitant emphysema were not significant.

| **Covariables** | **F ratio** | **p value** |
| --- | --- | --- |
| **mPAP** | 5.55 | 0.0226 |

Abbreviations: APH: associated pulmonary hypertension, DLCO: carbon monoxide diffusion capacity, FVC: forced vital capacity, HRCT: high-resolution computed tomography, mPAP: mean pulmonary arterial pressure, MRCDS: Medical Research Council dyspnea score.
